# Supplementary material for: Identification of the Key Molecular Drivers of Phosphorus Utilization Based on Host miRNA-mRNA and Gut Microbiome Interactions
Source: Int J Mol Sci. 2020 Apr 17;21(8):2818. doi: 10.3390/ijms21082818 (PMC7215353; doi:10.3390/ijms21082818)
Supplement: Supplementary file 1 [file ijms-21-02818-s001.xlsx]

## Sheet: Sheet1
supplementary table 1
The expression analysis between the phosphorus utilization groups showed 69 miRNAs differentially expressed at an s-value < 0.10.
miRNA	sequence	baseMean	log2FoldChange	log2FoldChange_shrink	lfcSE	lfcSE_shrink	pvalue	svalue
Novel_8_28985	GAGGAAUUCUCUGGGGCA	125.838	-2.63248	-2.47003	0.463037	0.465149	6.03813e-07	1.93648e-06
miR-148a-3p	UCAGUGCACUACAGAACUUUGU	610.157	1.04132	0.996519	0.167564	0.170785	1.76096e-05	2.05109e-05
miR-22-3p	AAGCUGCCAGUUGAAGAACUGU	2035.18	0.957202	0.92023	0.159322	0.164133	6.6814e-05	5.81996e-05
miR-146b-5p_2	UGAGAACUGAAUUCCAUAGGCGU	21296	-0.843213	-0.80336	0.137533	0.140416	0.000150489	0.000119484
miR-146b-5p	UGAGAACUGAAUUCCAUAGGCG	21543.8	-0.841995	-0.802114	0.137523	0.140395	0.000155771	0.000158151
Novel_1_1058	CGGCCAUCCUCUGCUACC	136.895	-2.69198	-2.41194	0.575096	0.611773	3.77008e-05	0.000184689
let-7f-3p	CUAUACAAUCUAUUGCCUUCCC	1800.78	-0.829307	-0.781809	0.149241	0.15251	0.000674536	0.000341613
miR-16-5p	UAGCAGCACGUAAAUAUUGGCG	2124.21	0.915705	0.854801	0.174511	0.178594	0.000667679	0.000476897
Novel_3_17205	GGGGUGGGGGAAAAAAAA	99.0184	1.42571	1.27988	0.309499	0.33215	0.000361995	0.000641979
Novel_1_3789	GGGACGGAACUACAAGAC	947.895	-1.08172	-0.984456	0.23101	0.242176	0.00100542	0.000888994
miR-2131-3p	CUGUUACUGUUCUUCUCAUGG	77.7699	-1.33758	-1.19233	0.305132	0.324077	0.000872914	0.00113708
let-7j-3p	CUAUACAGUCUAUUGCCUUCCU	3658.73	-0.714655	-0.673717	0.13219	0.13481	0.00296907	0.00142012
miR-142-5p	CAUAAAGUAGAAAGCACUACU	2760.3	0.901452	0.827346	0.188565	0.195891	0.00211683	0.00169077
miR-142-5p_2	CCCAUAAAGUAGAAAGCACUAC	2885.57	0.885787	0.810515	0.188689	0.196173	0.00280539	0.00202547
Novel_Z_46666	CCACCCGGACGAGCCCCC	300.581	-1.18709	-1.0501	0.2782	0.29792	0.00187174	0.00237435
let-7k	UGAGGUAGGAGGUUGUGUG	360.315	-1.07627	-0.959836	0.246947	0.263735	0.0022531	0.00271264
miR-146b-5p_3	UGAGAACUGAAUUCCAUAGGCU	8631.34	-0.682717	-0.641415	0.130912	0.1335	0.005852	0.00304436
miR-146b-5p_4	UGAGAACUGAAUUCCAUAGGCUG	8631.4	-0.682727	-0.641423	0.130917	0.133506	0.00585256	0.00333928
miR-190a-3p	CUAUAUAUCAAACAUAUUCCU	161.122	-0.997318	-0.895553	0.228505	0.239818	0.00311964	0.0036046
Novel_9_29689	GGAAUACCGGGUGCUGUAGGCUU	70593.2	1.17916	1.03898	0.270605	0.300387	0.00153575	0.00384894
miR-1388a-3p	AUCUCAGGUUCGUCAGCCCAUG	7415.68	0.689805	0.646168	0.135141	0.13741	0.00648556	0.00410118
Novel_2_9160	GGGGGAGAGGGAAAAAAA	330.685	1.29427	1.1146	0.317468	0.354766	0.00219277	0.00449339
Novel_2_10289	GGGAGGAAUUGGGUCUGG	74.3188	-1.54354	-1.30507	0.393777	0.445577	0.00192031	0.00489266
miR-1388a-5p	AGGACUGUCUAACCUGAGAAUG	2140.53	0.826072	0.745457	0.19149	0.198123	0.00846972	0.00536672
Novel_12_34161	GGGGGGGGGAGAAAAAAA	953.927	1.13602	0.982262	0.28026	0.310589	0.00367511	0.005822
miR-29a-3p	UAGCACCAUUUGAAAUCGGUU	923.359	0.900067	0.799115	0.219606	0.228533	0.0084729	0.00630566
Novel_Z_44474	AGAAGAAAUACGACGAGC	81.3485	-1.70231	-1.40519	0.469778	0.525604	0.00329945	0.00679999
miR-29c-3p	UAGCACCAUUUGAAAUCGGU	926.446	0.897032	0.794349	0.221017	0.230215	0.0092661	0.00727431
miR-29c-3p_2	UAGCACCAUUUGAAAUCGGUUA	926.446	0.897032	0.794349	0.221017	0.230215	0.0092661	0.00771591
miR-19b-3p_2	UGUGCAAAUCCAUGCAAAACUGA	6928.79	0.906806	0.799189	0.227398	0.236649	0.01011	0.00818742
miR-19b-3p	UGUGCAAAUCCAUGCAAAACUG	6692.4	0.912227	0.803255	0.229207	0.238679	0.0100124	0.0086287
miR-4286	ACCCCACUCCUGGUACC	526.782	-0.742719	-0.667417	0.176724	0.182026	0.0172631	0.00926051
miR-1788-3p	CAGGCAGCGAAAGCAAGUCUG	295.353	-1.05781	-0.890558	0.290462	0.316916	0.0112938	0.0100825
miR-194	UGUAACAGCAACUCCAUGUGG	119787	0.614454	0.567714	0.135293	0.137619	0.0306048	0.0108757
miR-1788-3p_2	CAGGCAGCGAAAGCAAGUCUGG	294.461	-1.0564	-0.888431	0.290802	0.317456	0.0115481	0.0116269
miR-194_2	UGUAACAGCAACUCCAUGUGGA	120631	0.61315	0.566284	0.135395	0.137727	0.031484	0.01236
Novel_2_12370	GUUUGAAGAGGCUGUUGGCCC	95.4148	-1.48753	-1.19024	0.437689	0.49684	0.00774292	0.0131141
miR-3963	UGUAUCCCACUUCUGACAC	813.915	-0.933167	-0.785441	0.262871	0.282842	0.0200588	0.0141013
miR-99a-5p	AACCCGUAGAUCCGAUCUUGU	92.6147	0.881078	0.74035	0.253589	0.268397	0.027458	0.0152655
miR-99a-5p_2	AACCCGUAGAUCCGAUCUUGUG	93.2496	0.871867	0.730821	0.252834	0.267657	0.0296226	0.0164662
miR-16-5p_2	UAGCAGCACGUAAAUAUUGGU	387.584	0.689597	0.608309	0.181693	0.187519	0.0430146	0.0176098
Novel_13_34549	ACCCUUGUUUAAUGAAGAGG	15.2457	-2.27785	-1.61572	0.761228	0.944013	0.0101866	0.0192206
miR-16-5p_3	UAGCAGCACGUAAAUAUUGGUG	403.261	0.633844	0.547172	0.182924	0.188893	0.0881635	0.021484
Novel_3_13333	GGGCCAGAUCUUGUCUGA	34.4839	-2.6364	-1.71847	0.890178	1.19971	0.00932197	0.023773
miR-140-5p	AGUGGUUUUACCCUAUGGUAG	767.931	0.646036	0.53839	0.204175	0.211279	0.112421	0.0266401
miR-140-5p	CAGUGGUUUUACCCUAUGGUAG	770.291	0.640722	0.533435	0.203455	0.210417	0.117138	0.0294828
miR-33-5p	GUGCAUUGUAGUUGCAUUGC	45.4323	-1.27457	-0.876735	0.447341	0.557286	0.0332067	0.0322541
miR-33-2-5p	GUGCAUUGUAGUUGCAUUGCAU	45.4323	-1.27457	-0.876735	0.447341	0.557286	0.0332067	0.0349099
Novel_5_22420	AUACCCAAUACUUCUGAG	145.741	-0.794959	-0.609452	0.270526	0.297362	0.080367	0.0376014
miR-7-1-3p	CAACAAAUCACAGUCUGCCAUA	4730.86	-0.648691	-0.529076	0.207247	0.224052	0.114868	0.0404014
miR-33a-5p	GUGCAUUGUAGUUGCAUUGCA	44.0085	-1.26167	-0.845519	0.451184	0.569211	0.0372671	0.0431156
Novel_1_7552	CGCCUCAGAGAGGGCACC	172.125	-0.926356	-0.642104	0.33475	0.396649	0.0709793	0.0463206
miR-100-5p	AACCCGUAGAUCCGAACUUGUG	704.203	0.562366	0.473128	0.182254	0.188499	0.187088	0.0494322
miR-99a-5p	AACCCGUAGAUCCGAACUUGU	697.626	0.563753	0.470886	0.182449	0.188557	0.185026	0.052494
miR-130b-5p	CCUCUUUCCCUGUUGCACUACU	1083.44	-0.557832	-0.468093	0.17997	0.186343	0.189926	0.0554742
miR-130a-3p	CAGUGCAAUAUUAAAAGGGCAU	456.532	-0.635498	-0.501605	0.222723	0.235272	0.159163	0.0584572
let-7b-3p	CUAUACAACCUACUGCCUUCCC	555.015	-0.532666	-0.450885	0.171322	0.176138	0.218671	0.0615026
Novel_NW_015440444.1_47932	GGGGCGCCGCCCGCCCGC	621.89	0.724562	0.533288	0.266655	0.291406	0.131058	0.064479
miR-3084-3p	UUCUGCCAGUCUCCUUCAGAC	214.942	-0.564218	-0.460389	0.195291	0.201491	0.214731	0.0675553
let-7a-3p	CUAUACAAUCUACUGUCUUUC	2460.26	-0.552165	-0.453927	0.185281	0.194274	0.214001	0.0705699
let-7k-3p	CUAUACAAUCUACUGUCUUUCC	2471.49	-0.553541	-0.454393	0.186117	0.195263	0.213335	0.073491
Novel_27_42660	GGGGGUGCGCGGGGGGUC	75.0943	-0.944422	-0.614923	0.363468	0.432051	0.0867767	0.0763192
Novel_5_23875	GGCUGGGGCGCGAAGCGGGGC	659.951	0.828232	0.563403	0.309978	0.361428	0.102394	0.0791083
miR-1788-5p	GGCUUGUUUUCCGUUGCCUGCG	408.126	-0.650547	-0.489502	0.238892	0.25916	0.168945	0.0819182
Novel_18_37982	GUGCCCGCAUUCUCCACC	2951.51	-0.514924	-0.429195	0.175231	0.178974	0.270731	0.0848806
Novel_27_43029	GGGGGUGCGCGGGGGGGU	71.1465	-0.873211	-0.546793	0.35308	0.411677	0.118441	0.0880257
Novel_28_43334	GGGGGGGAGAAAAAAAAC	225.69	0.785718	0.516616	0.31499	0.367144	0.140913	0.0911591
let-7i-3p	CUGCGCAAGCUACUGCCUUGCU	101.757	0.632771	0.462607	0.251499	0.266925	0.216473	0.0942168
miR-29b-3p	CUAGCACCAUUUGAAAUCAGU	628.527	-0.450838	-0.39182	0.144152	0.145541	0.371181	0.0974243
